# Supplementary material
Source: MDPI journal article supplement (https://www.mdpi.com/2073-4344/12/5/471)
Supplement: s1 [file catalysts-1653258-supplementary-revised.pdf › catalysts-1653258-supplementary-revised.pdf]

# Low-temperature $\text{NH}_3$ -SCR on $\text{Ce}_x\text{-Mn-Ti}_y$ catalysts: Improved performance by the mutual effect between Ce and Ti

Qianwen Zhu <sup>1</sup>, Aiyong Wang <sup>2,\*</sup>, Jinshui Zhang <sup>3</sup>, Yanglong Guo <sup>1</sup>, Yun Guo <sup>1</sup>, Li Wang <sup>1</sup> and Wangcheng Zhan <sup>1,\*</sup>

<sup>1</sup> Key Laboratory for Advanced Materials, Research Institute of Industrial Catalysis, School of Chemistry and Molecular Engineering, East China University of Science and Technology, Shanghai 200237, P. R. China

<sup>2</sup> International Joint Laboratory of Catalytic Chemistry, Department of Chemistry, Research Center of Nano Science and Technology, College of Sciences, Shanghai University, Shanghai 200444, P. R. China

<sup>3</sup> State Key Laboratory of Photocatalysis on Energy and Environment College of Chemistry, Fuzhou University, 350116 Fuzhou, P. R. China.

\*Corresponding authors:

E-mail address: zhanwc@ecust.edu.cn (W.Z), aiyong@shu.edu.cn (A.W)

Summary of the supporting information: 8 pages and 9 figures

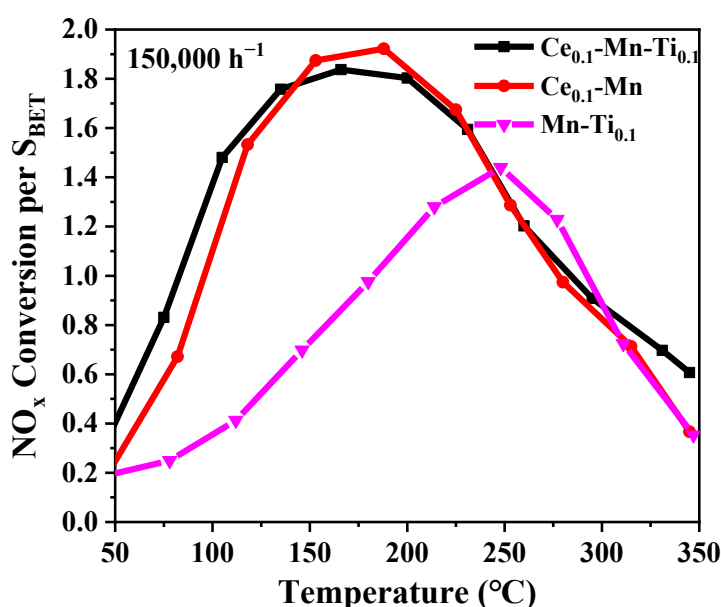

**Figure S1.**  $\text{NO}_x$  conversion per unit  $S_{\text{BET}}$  under  $150,000 \text{ h}^{-1}$  over  $\text{Ce}_x\text{-Mn-Ti}_y$  catalysts. Reaction conditions:  $[\text{NO}] = [\text{NH}_3] = 500 \text{ ppm}$ ,  $[\text{O}_2] = 5 \text{ vol.}\%$ , with Ar as the balanced gas.

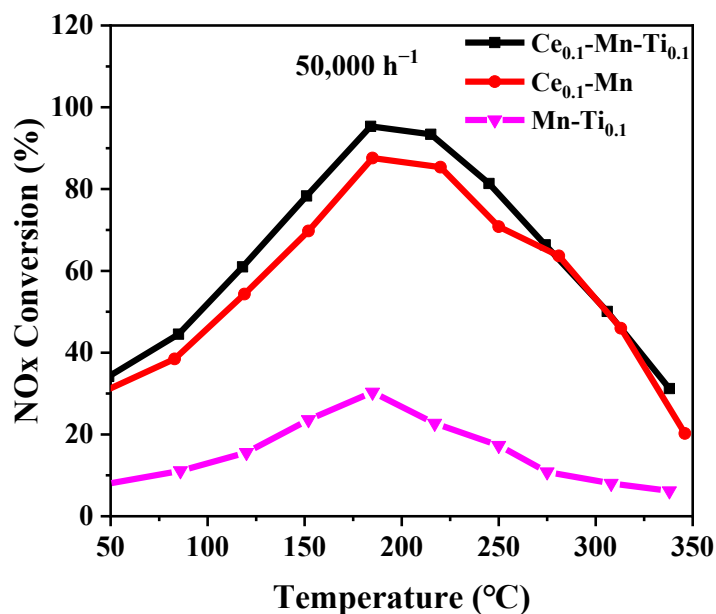

**Figure S2.** H<sub>2</sub>O resistance under 50,000 h<sup>-1</sup> over Ce<sub>x</sub>-Mn-Ti<sub>y</sub> catalysts. Reaction conditions: [NO] = [NH<sub>3</sub>] = 500 ppm, [O<sub>2</sub>] = 5 vol.%, H<sub>2</sub>O = 2 vol.%, with Ar as the balanced gas.

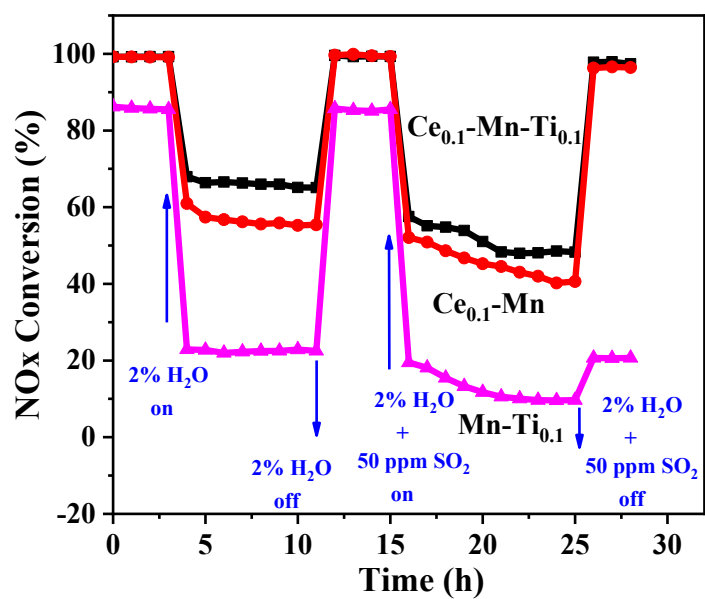

**Figure S3.** H<sub>2</sub>O/SO<sub>2</sub> resistance of Ce<sub>x</sub>-Mn-Ti<sub>y</sub> catalysts at 100 °C. Reaction conditions: [NO] = [NH<sub>3</sub>] = 500 ppm, [O<sub>2</sub>] = 5 vol.%, 50 ppm SO<sub>2</sub> (when needed), 2 vol.% H<sub>2</sub>O (when needed), with Ar as the balanced gas and a GHSV = 50,000 h<sup>-1</sup>.

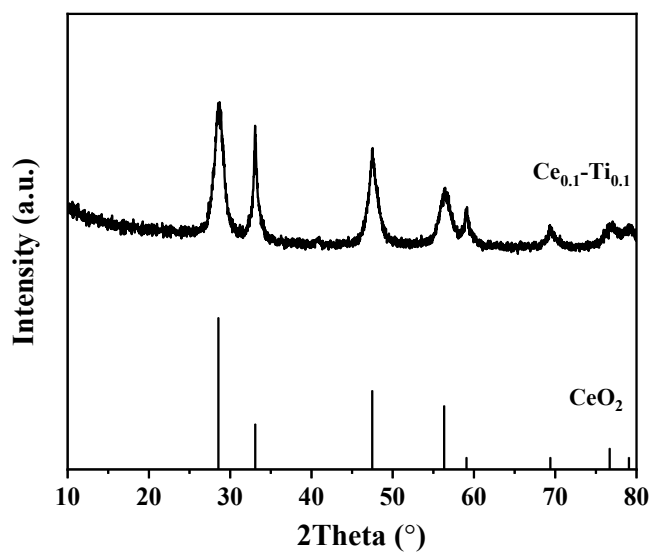

Figure S4. XRD patterns of the  $\text{Ce}_{0.1}\text{-Ti}_{0.1}$  catalyst.

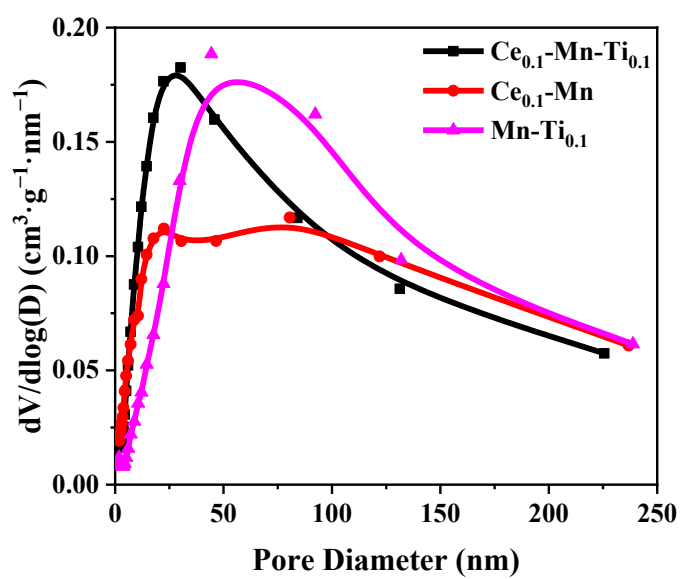

Figure S5. Pore size distribution of the  $\text{Ce}_x\text{-Mn-Ti}_y$  catalysts.

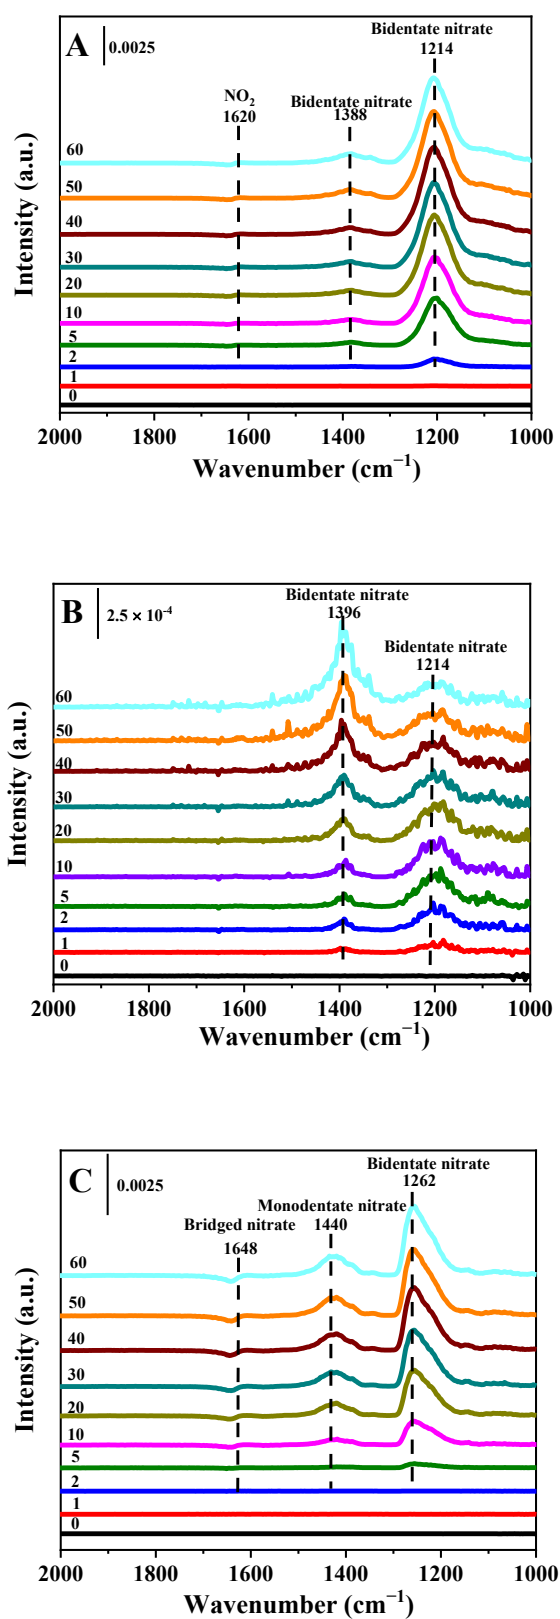

**Figure S6.** In situ DRIFTS of 500 ppm NO + 5 vol.% O<sub>2</sub>/Ar adsorption on Ce<sub>0.1</sub>-Mn-Ti<sub>0.1</sub> (A), Ce<sub>0.1</sub>-Mn (B) and Mn-Ti<sub>0.1</sub> (C) catalysts at 50 °C.

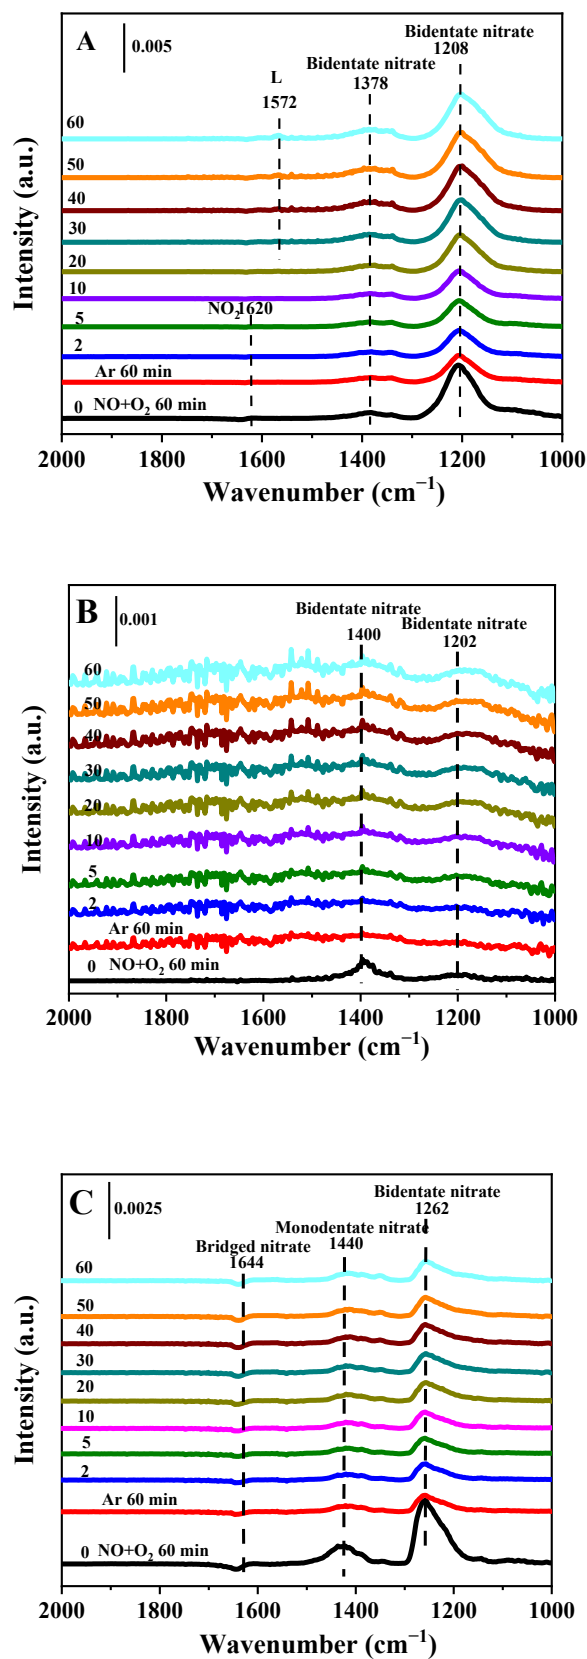

**Figure S7.** In situ DRIFTS of 500 ppm NH<sub>3</sub> adsorption on Ce<sub>0.1</sub>-Mn-Ti<sub>0.1</sub> (A), Ce<sub>0.1</sub>-Mn (B) and Mn-Ti<sub>0.1</sub> (C) catalysts after adsorption of 500 ppm NO + 5 vol.% O<sub>2</sub>/Ar at 50 °C.

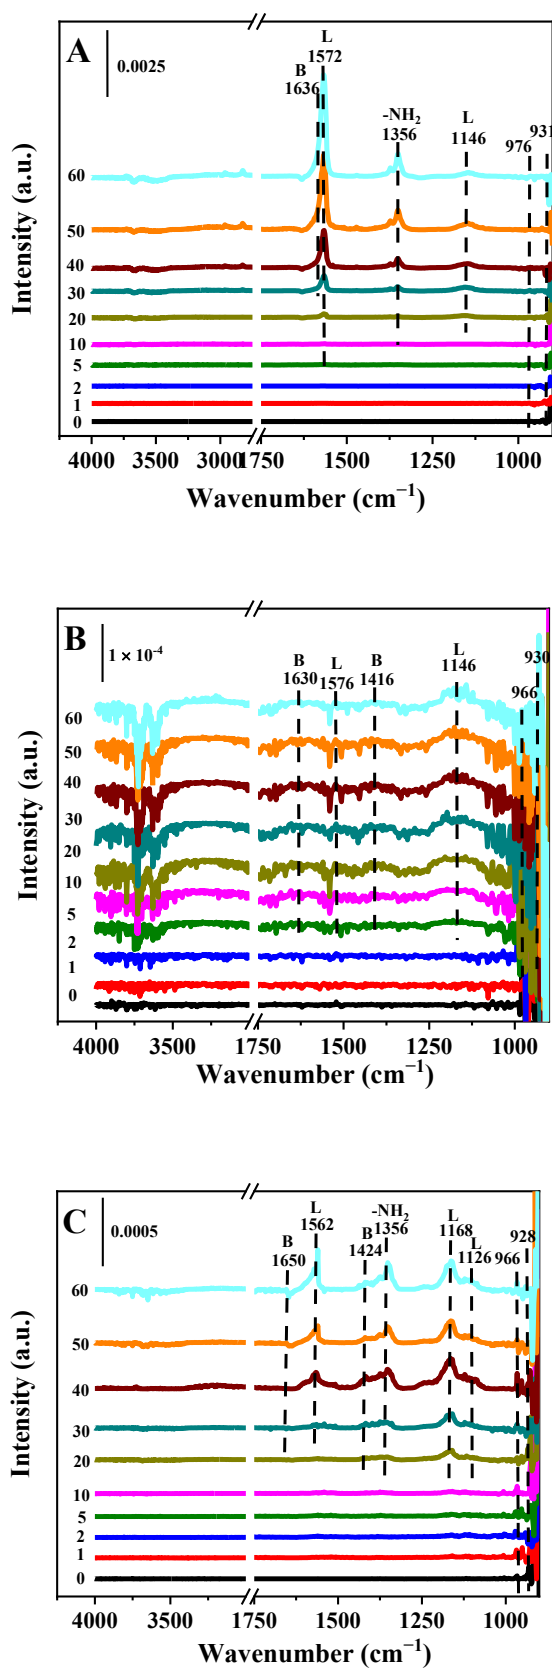

**Figure S8.** In situ DRIFTS of 500 ppm  $\text{NH}_3$  adsorption on  $\text{Ce}_{0.1}\text{-Mn-Ti}_{0.1}$  (A),  $\text{Ce}_{0.1}\text{-Mn}$  (B) and  $\text{Mn-Ti}_{0.1}$  (C) catalysts at 50 °C.

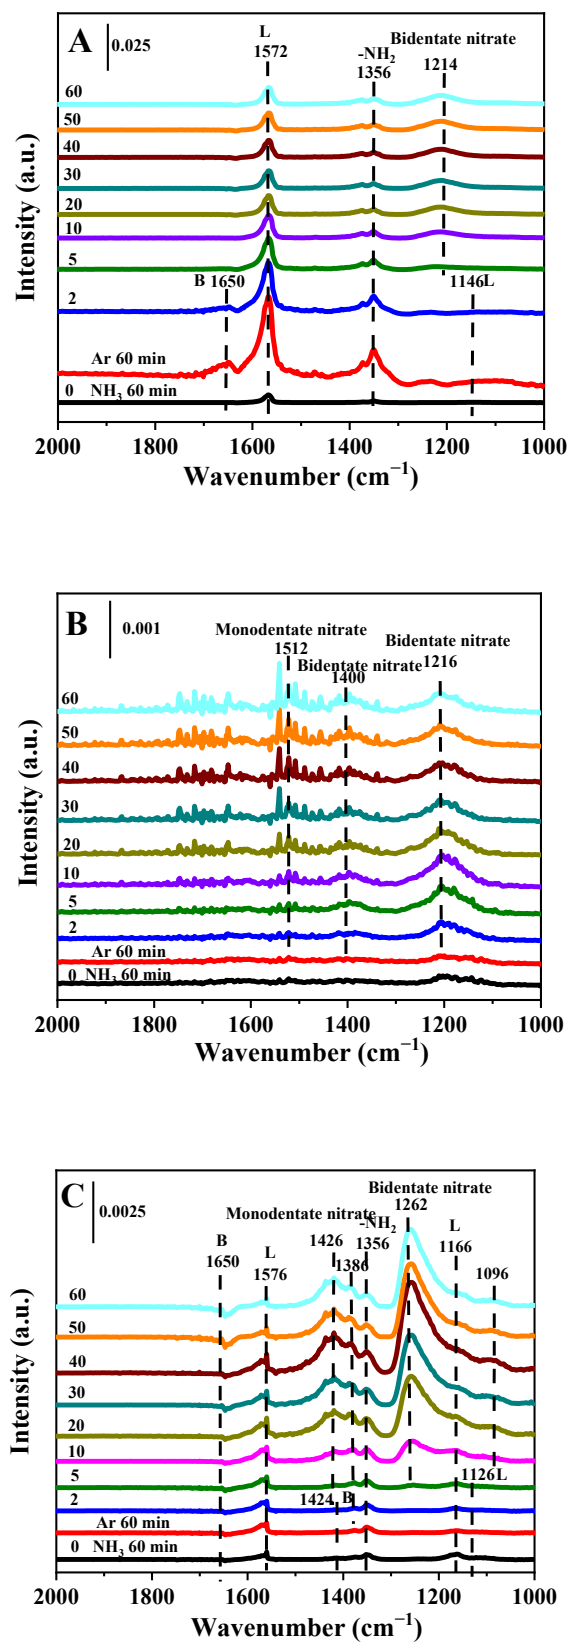

**Figure S9.** In situ DRIFTS of 500 ppm  $\text{NO} + 5\% \text{O}_2/\text{Ar}$  adsorption on  $\text{Ce}_{0.1}\text{-Mn-Ti}_{0.1}$  (A),  $\text{Ce}_{0.1}\text{-Mn}$  (B) and  $\text{Mn-Ti}_{0.1}$  (C) catalysts after adsorption of 500  $\text{NH}_3/\text{Ar}$  at  $50^\circ\text{C}$ .
